# Supplementary material for: Continuous MOF Membrane-Based Sensors via Functionalization of Interdigitated Electrodes
Source: PubMed Central journal article supplement (PMC8000374; doi:10.3390/membranes11030176), 2021-02-28
Supplement: membranes-11-00176-s001.pdf [file membranes-11-00176-s001.pdf]

# Supplementary Information: Continuous MOF Membrane-based Sensors via Functionalization of Interdigitated Electrodes

Susan E. Henkelis, Stephen J. Percival, Leo J. Small, David X. Rademacher and Tina M. Nenoff

Table of Contents:

1. Scanning electron microscopy images of Co-MOF-74
  - a. Magnitude of 50  $\mu\text{m}$
  - b. Magnitude of 30  $\mu\text{m}$
  - c. EDX Mapping
2. Scanning electron microscopy images of Mg-MOF-74
  - a. Magnitude of 100  $\mu\text{m}$
  - b. Magnitude of 50  $\mu\text{m}$
  - c. Magnitude of 50  $\mu\text{m}$  to highlight chipping
3. Scanning electron microscopy images of Ni-MOF-74
  - a. Magnitude of 30  $\mu\text{m}$
  - b. EDX Mapping

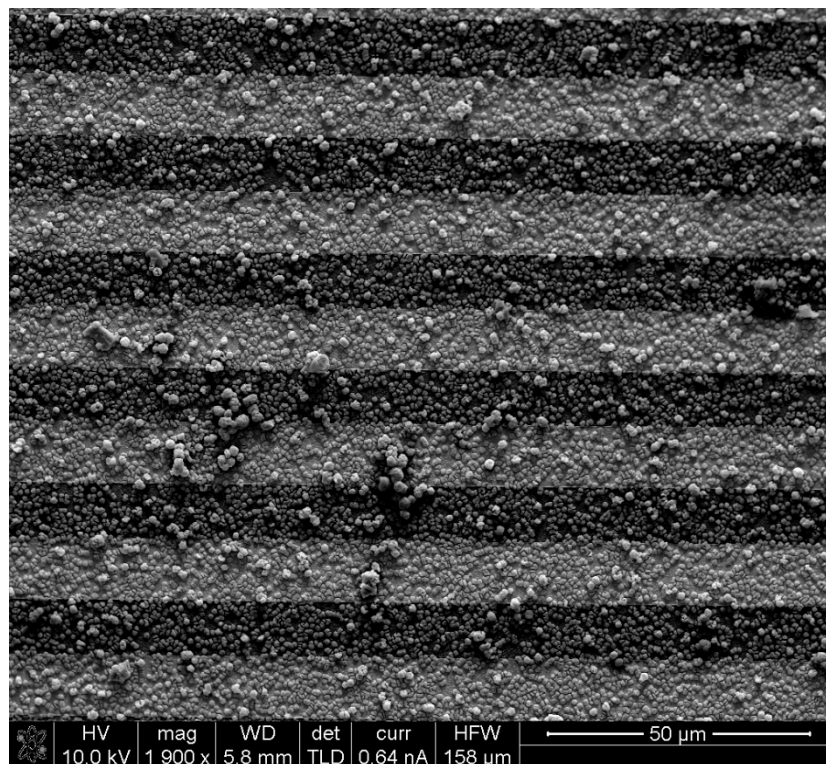

**Figure 1a.** Scanning electron microscopy image of Co-MOF-74 at 50  $\mu\text{m}$

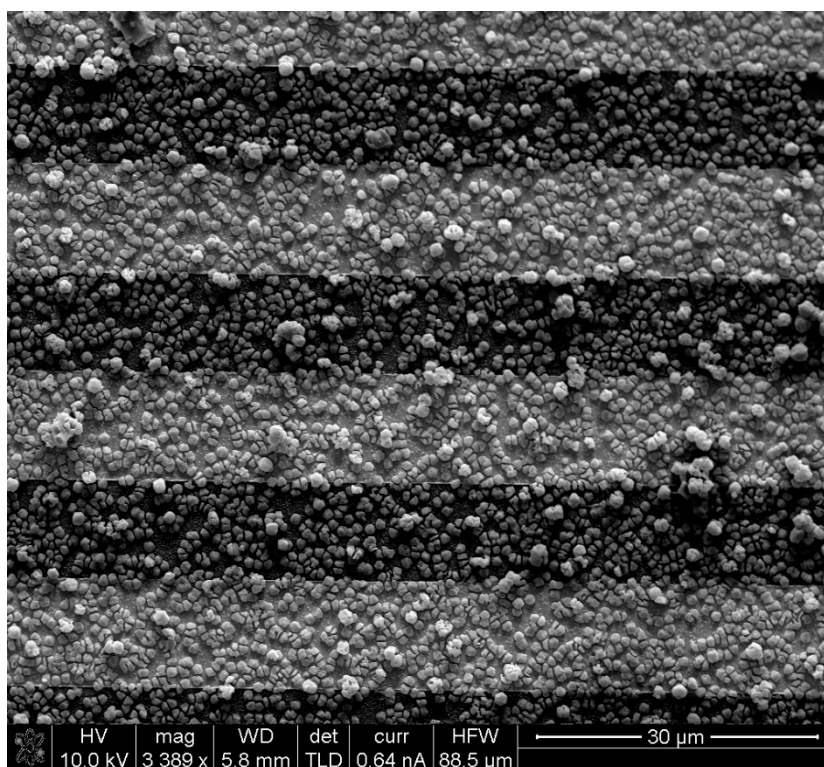

**Figure 1b.** Scanning electron microscopy image of Co-MOF-74 at 30  $\mu\text{m}$

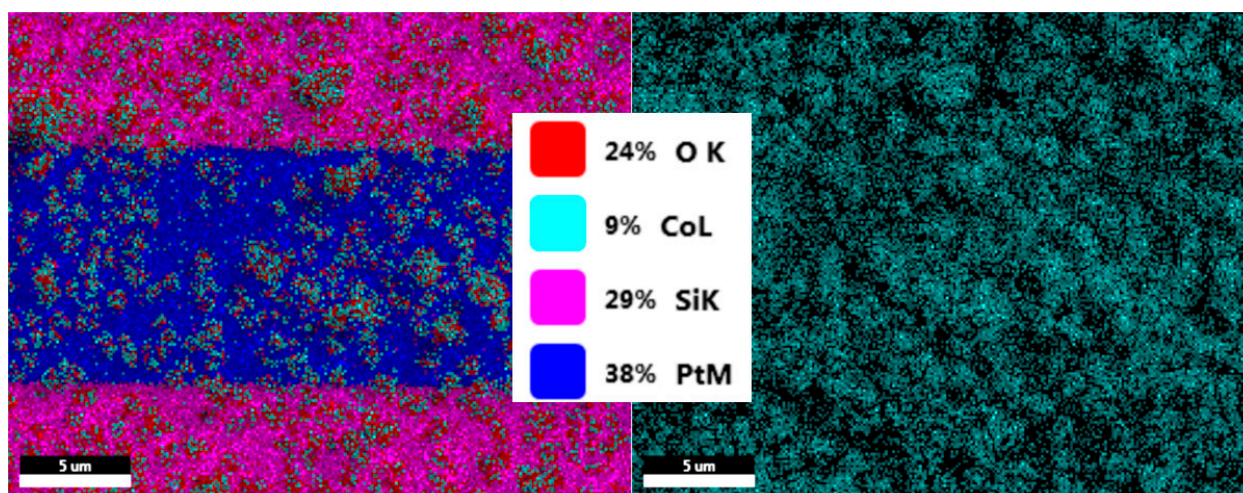

**Figure 1c.** EDX Quantification for Co-MOF-74, highlighting Oxygen (red), Cobalt (aqua), Silicon (pink) and Platinum (blue)



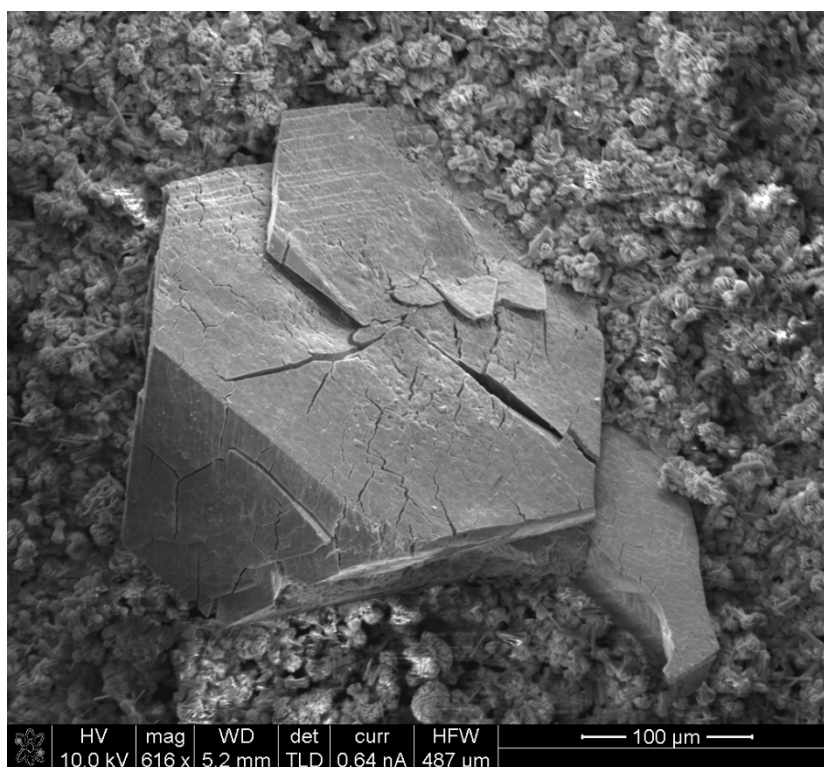

**Figure 2a.** Scanning electron microscopy image of Mg-MOF-74 at 100 μm

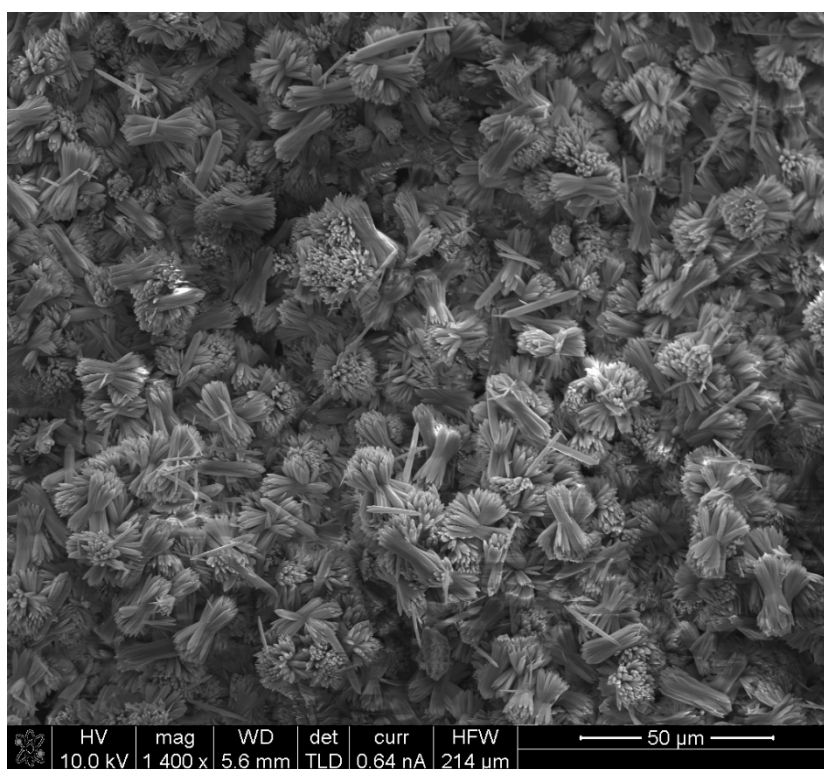

**Figure 2b.** Scanning electron microscopy image of Mg-MOF-74 at 50 μm

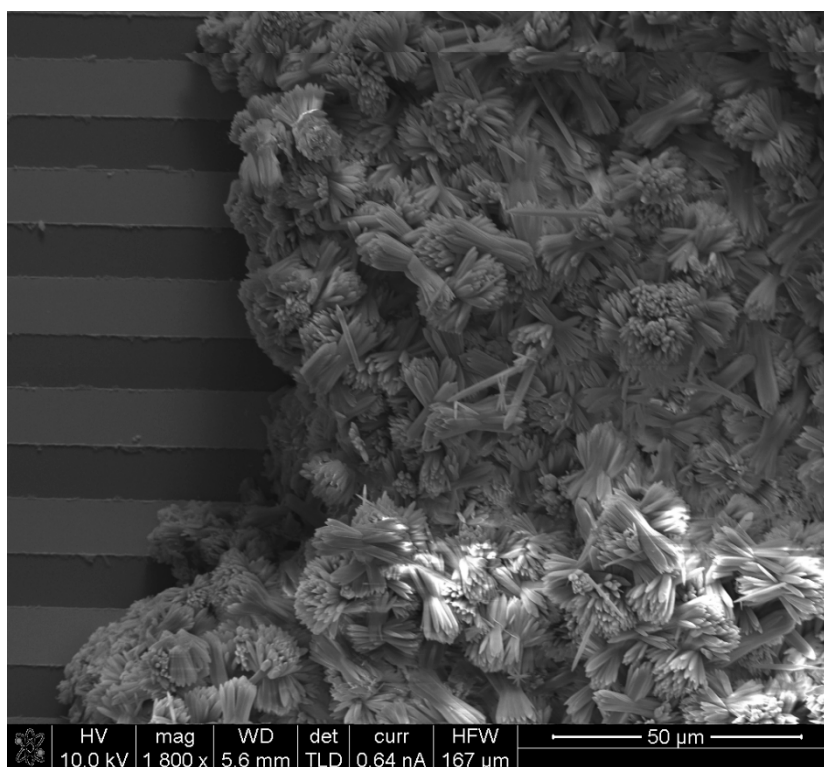

**Figure 2c.** Scanning electron microscopy image of Mg-MOF-74 at 50 μm

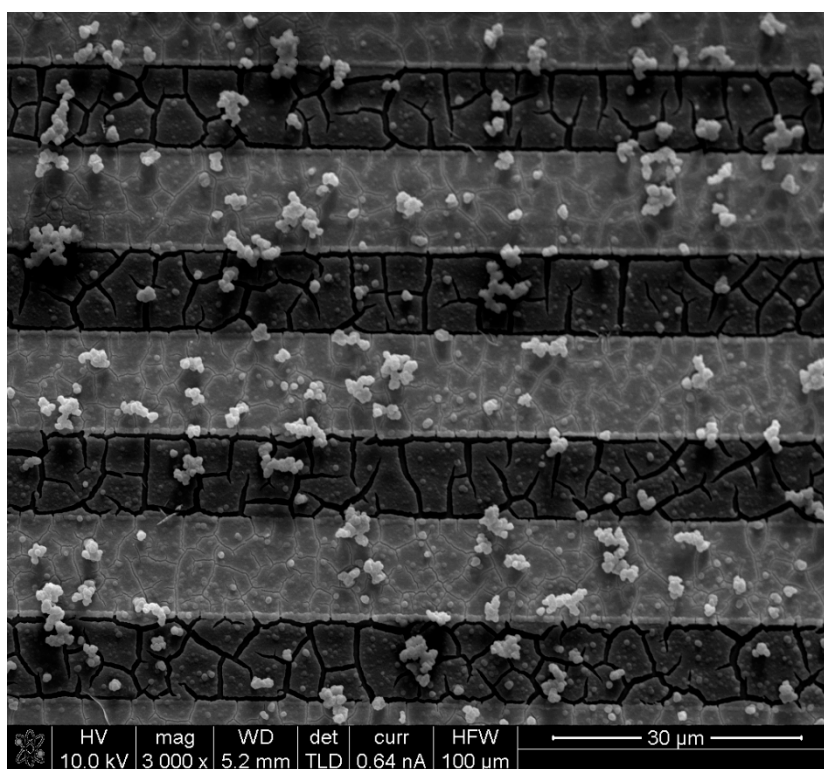

**Figure 3a.** Scanning electron microscopy image of Ni-MOF-74 at 30 μm

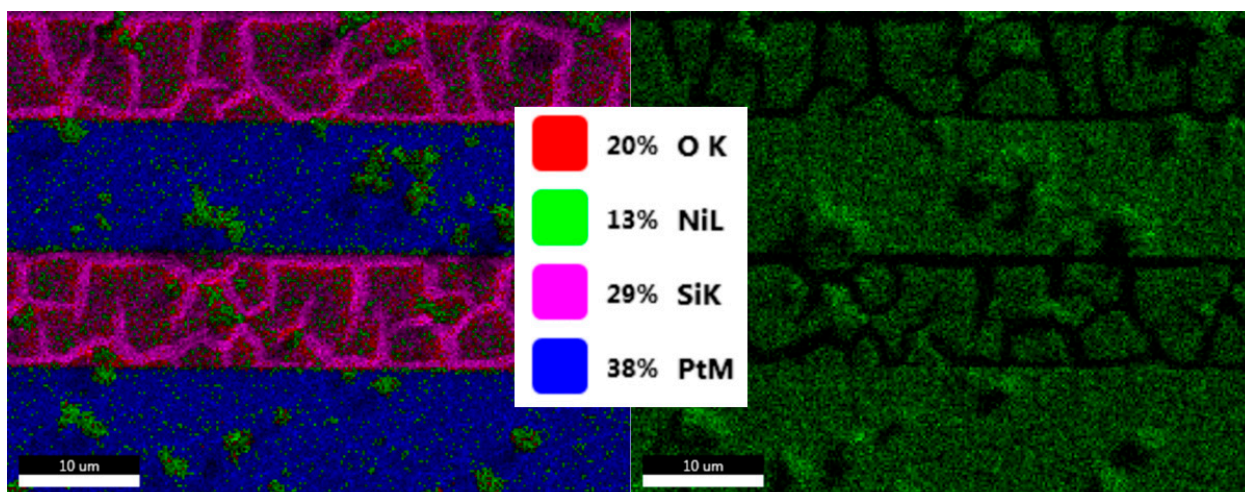

**Figure 3b.** EDX Quantification for Ni-MOF-74, highlighting Oxygen (red), Nickel (green), Silicon (pink) and Platinum (blue)
